# Supplementary material for: The Proper Splicing of RNAi Factors Is Critical for Pericentric Heterochromatin Assembly in Fission Yeast
Source: PubMed Central journal article supplement (PMC4038458; doi:10.1371/journal.pgen.1004334), 2014-05-29

Figure S2

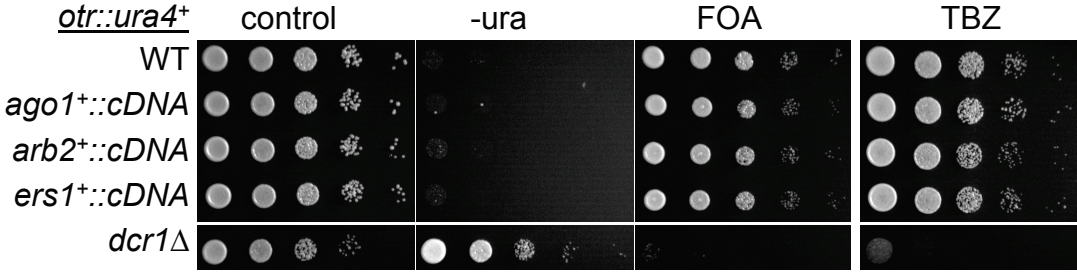

Supplement: pgen.1004334.s002.pdf [file pgen.1004334.s002.pdf]
